# Supplementary material for: Emerin mislocalization during chromatin bridge resolution can drive prostate cancer cell invasiveness in a collagen-rich microenvironment
Source: Springer Nature journal article supplement (doi:10.1038/s12276-024-01308-w), 2024-09-01
Supplement: MOESM1 [file 12276_2024_1308_MOESM1_ESM.pdf]

## Supplementary Information

Supplementary Material and Methods

Supplementary Tables 1 to 8

Supplementary Figures 1 to 5

Caption to Supplementary Movies 1-6

### Supplementary Material and Methods

*RNA expression in PC-3 cell line.* Data quality was checked using FastQC 0.11.9 <sup>1</sup> and MultiQC 1.11 <sup>2</sup> reporting tools. After quality control, raw reads were trimmed using Trimmomatic 0.39 <sup>3</sup> and then aligned to the human genome GRCh38.p10 using STAR 2.7.10 <sup>4</sup>. Mapped reads were counted across genomic features using featureCounts 2.0.3 <sup>5</sup>. Read counts were normalized and then subjected to differential analysis using DESeq2 1.360.0 <sup>6</sup>. The absolute value of log<sub>2</sub> fold change  $\geq (0.5)$  and adjusted p-value  $< 0.05$  were used as criteria to identify differentially expressed genes.

*Membrane measurement of MN and NE.* Since correlative light electron microscopy <sup>7</sup> deals with tangential sections of cells, we used the Cavalieri method adapted to micronuclei cut tangentially <sup>7-11</sup>. We used the 200 nm tomography sections for our analysis. In each serial 200 nm slice, where the nucleus or micronucleus (MN) was visible, using the RADIUS (ThermoFisher) program in cells where MN was detected, we measured the area of the micronucleus slice, the length of the perimeter of its nuclear envelope and the length of the membranes of the invaginations of the nuclear envelope on each serial slice. In neighboring cells where MN was not found, we measured the area of the section of the nucleus, the length of the perimeter of the nuclear envelope and the length of the membranes of the invaginations of the nuclear envelope. Additionally, for each nucleus and each micronucleus, we calculated the average ratio of the surface area to the length of the nuclear membranes (the sum of the perimeter and invaginations). The control nucleus was considered to be in a cell that was located next to a cell with a micronucleus. In total, 5 randomly selected nuclei of neighboring cells and 15 MNs were measured. Then we calculated the ratio between the surface area and the length of nuclear double membranes for all slices of a given nucleus and MN. Then the average ratio was calculated. We did not take the nucleus of the cell where MN was detected into our calculations, since part of the DNA went into MN there, which violated the ratio of the nuclear shell to the volume of the nucleus. We considered the resulting average ratio as a single statistical value (variant) for a particular core or microkernel. That is, there are 15 average values for 15 microkernels and 5 average values for neighboring cores (Supplementary Fig. 2c).

### References

- 1 Andrews S *et al.* in *1:1* (Babraham Bioinf, 2015).
- 2 Ewels, P., Magnusson, M., Lundin, S. & Källér, M. MultiQC: summarize analysis results for multiple tools and samples in a single report. *Bioinformatics* **32**, 3047-3048 (2016). <https://doi.org/10.1093/bioinformatics/btw354>

- 3 Bolger, A. M., Lohse, M. & Usadel, B. Trimmomatic: a flexible trimmer for Illumina  
sequence data. *Bioinformatics* **30**, 2114-2120 (2014).  
<https://doi.org/10.1093/bioinformatics/btu170>
- 4 Dobin, A. *et al.* STAR: ultrafast universal RNA-seq aligner. *Bioinformatics* **29**, 15-21  
(2013). <https://doi.org/10.1093/bioinformatics/bts635>
- 5 Liao, Y., Smyth, G. K. & Shi, W. featureCounts: an efficient general purpose program  
for assigning sequence reads to genomic features. *Bioinformatics* **30**, 923-930 (2014).  
<https://doi.org/10.1093/bioinformatics/btt656>
- 6 Love, M. I., Huber, W. & Anders, S. Moderated estimation of fold change and  
dispersion for RNA-seq data with DESeq2. *Genome Biol* **15**, 550 (2014).  
<https://doi.org/10.1186/s13059-014-0550-8>
- 7 Beznoussenko, G. V. & Mironov, A. A. Correlative video-light-electron microscopy  
of mobile organelles. *Methods Mol Biol* **1270**, 321-346 (2015).  
[https://doi.org/10.1007/978-1-4939-2309-0\\_23](https://doi.org/10.1007/978-1-4939-2309-0_23)
- 8 Mironov, A. A. Estimation of subcellular organelle volume from ultrathin sections  
through centrioles with a discretized version of the vertical rotator. *J Microsc* **192**, 29-  
36 (1998). <https://doi.org/10.1046/j.1365-2818.1998.00392.x>
- 9 Mironov, A. A., Beznusenko, G. V., Sesorova, I. S. & Banin, V. V. [How to measure  
structures, or new stereology: III. Stereology and electron microscopy]. *Morfologiya*  
**129**, 72-75 (2006).
- 10 Beznoussenko, G. V. *et al.* Trans-membrane area asymmetry controls the shape of  
cellular organelles. *Int J Mol Sci* **16**, 5299-5333 (2015).  
<https://doi.org/10.3390/ijms16035299>
- 11 Beznoussenko, G. V., Ragnini-Wilson, A., Wilson, C. & Mironov, A. A. Three-  
dimensional and immune electron microscopic analysis of the secretory pathway in  
*Saccharomyces cerevisiae*. *Histochem Cell Biol* **146**, 515-527 (2016).  
<https://doi.org/10.1007/s00418-016-1483-y>

**Supplementary Table 1** Clinical and pathological parameters of prostate cancer cohort.

| <b>Clinical and pathological parameters</b> |              | <b>n</b> | <b>%</b> |
|---------------------------------------------|--------------|----------|----------|
| <b>Age</b>                                  | ≤median (65) | 52       | 44.4     |
|                                             | >median (65) | 65       | 55.6     |
|                                             | Total        | 117      |          |
| <b>T status</b>                             | pT2          | 62       | 53.0     |
|                                             | pT3          | 55       | 47.0     |
|                                             | Total        | 117      |          |
| <b>N status</b>                             | N0           | 108      | 94.7     |
|                                             | N1           | 6        | 5.3      |
|                                             | Total        | 114      |          |
| <b>Gleason score</b>                        | 7            | 82       | 73.9     |
|                                             | ≥8           | 29       | 26.1     |
|                                             | Total        | 111      |          |
| <b>Pre-operative PSA</b>                    | <10 ng/ml    | 80       | 68.4     |
|                                             | ≥10 ng/ml    | 37       | 31.6     |
|                                             | Total        | 117      |          |
| <b>Biochemical recurrence</b>               | No           | 71       | 65.1     |
|                                             | Yes          | 38       | 34.9     |
|                                             | Total        | 109      |          |
| <b>Metastasis</b>                           | No           | 110      | 94.0     |
|                                             | Yes          | 7        | 6.0      |
|                                             | Total        | 117      |          |

**Supplementary Table 2** Uni- and multivariate analysis of association between Emerin and clinicopathological parameters and Biochemical Recurrence in prostate cancer cohort.

|                                                     | univariate |      |      |        | multivariate |      |      |        |
|-----------------------------------------------------|------------|------|------|--------|--------------|------|------|--------|
|                                                     | HR         | CI   | CI   | pvalue | HR           | CI   | CI   | pvalue |
| <b>Emerin-rich MN &lt;75th vs. ≥75th percentile</b> | 3.13       | 1.64 | 5.98 | 0.0006 | 2.98         | 1.53 | 5.84 | 0.0014 |
| <b>Age ≤65 vs. &gt;65</b>                           | 0.93       | 0.49 | 1.75 | 0.8160 | -            | -    | -    | -      |
| <b>Pre-operative PSA &lt;10 vs. ≥ 10 [ng/ml]</b>    | 1.42       | 0.74 | 2.73 | 0.2880 | -            | -    | -    | -      |
| <b>pT2 vs. pT3</b>                                  | 2.08       | 1.06 | 4.08 | 0.0342 | 1.68         | 0.80 | 3.52 | 0.1707 |
| <b>pN0 vs. pN1</b>                                  | 3.31       | 1.15 | 9.51 | 0.0261 | 2.70         | 0.88 | 8.27 | 0.0829 |
| <b>Gleason score 7 vs. ≥8</b>                       | 2.17       | 1.12 | 4.20 | 0.0217 | 2.21         | 1.11 | 4.39 | 0.0238 |

**Supplementary Table 3** Differentially expressed genes among tumors with Emerin-rich MN or Emerin pauperized from NE.

| Symbol  | Entrez | log2FC | p-val |
|---------|--------|--------|-------|
| SRGN    | 5552   | 0.87   | 0.002 |
| CXCR4   | 7852   | 0.67   | 0.009 |
| COL1A2  | 1278   | 2.04   | 0.009 |
| COL5A2  | 1290   | 0.47   | 0.009 |
| APOE    | 348    | 1.51   | 0.011 |
| COL3A1  | 1281   | 0.98   | 0.012 |
| SPARC   | 6678   | 0.96   | 0.013 |
| CTSK    | 1513   | 0.43   | 0.013 |
| VIM     | 7431   | 1.64   | 0.018 |
| LUM     | 4060   | 0.91   | 0.019 |
| TGFB1   | 7040   | 0.29   | 0.020 |
| EPHB4   | 2050   | 0.43   | 0.021 |
| EMILIN1 | 11117  | 1.09   | 0.024 |
| GSN     | 2934   | 1.17   | 0.027 |
| AEBP1   | 165    | 1.34   | 0.029 |
| ID4     | 3400   | 1.31   | 0.029 |
| IGFBP7  | 3490   | 1.39   | 0.031 |
| TGFBR2  | 7048   | 0.81   | 0.032 |
| IGFBP4  | 3487   | 1.12   | 0.032 |
| COL6A3  | 1293   | 0.85   | 0.033 |
| C1S     | 716    | 0.84   | 0.033 |
| TCF4    | 6925   | 0.67   | 0.033 |
| CCL5    | 6352   | 0.72   | 0.035 |
| ANXA2P2 | 304    | 0.66   | 0.035 |
| SMAD3   | 4088   | 0.30   | 0.038 |
| COL1A1  | 1277   | 0.78   | 0.040 |
| SFRP1   | 6422   | 0.72   | 0.042 |
| MMP2    | 4313   | 0.77   | 0.042 |
| MAP2K4  | 6416   | -0.21  | 0.043 |
| COL18A1 | 80781  | 1.31   | 0.043 |
| THBS2   | 7058   | 0.31   | 0.044 |
| FN1     | 2335   | 1.28   | 0.045 |
| PIK3R1  | 5295   | 0.27   | 0.047 |
| CCDC80  | 151887 | 0.50   | 0.050 |

**Supplementary Table 4** The top 9 up-regulated genes in both datasets – RNA sequencing of PC-3 (control vs. EMD-KO) and Nanostring analysis of tumors with Emerin-rich MN or Emerin pauperized from NE vs normal Emerin.

| <b>external_gene_name</b> | <b>log2FC RNAseq</b> | <b>p-val RNAseq</b> | <b>log2FC Nanostring</b> | <b>p-val Nanostring</b> |
|---------------------------|----------------------|---------------------|--------------------------|-------------------------|
| CXCR4                     | 3.31                 | 1.50127E-08         | 0.67                     | 0.0085459               |
| APOE                      | 1.07                 | 0.00182509          | 1.51                     | 0.0105515               |
| SPARC                     | 0.62                 | 0.041990448         | 0.96                     | 0.0129548               |
| VIM                       | 0.98                 | 1.36492E-09         | 1.64                     | 0.0178852               |
| GSN                       | 1.01                 | 7.49137E-12         | 1.17                     | 0.0271238               |
| ANXA2P2                   | 0.66                 | 0.001324555         | 0.66                     | 0.0351556               |
| SFRP1                     | 1.17                 | 0.000457857         | 0.72                     | 0.0415546               |
| COL18A1                   | 0.50                 | 2.4982E-05          | 1.31                     | 0.0429317               |
| FN1                       | 0.69                 | 7.89609E-05         | 1.28                     | 0.0449681               |

**Supplementary Table 5** Prostate cancer metastasis – sample characteristics.

| Number | TMA    | Patient | Organ              | Type           |
|--------|--------|---------|--------------------|----------------|
| 1      | PCMET2 | G-01-JA | brain              | metastasectomy |
| 2      | PCMET2 | G-01-JA | brain              | metastasectomy |
| 3      | PCMET2 | G-02-MJ | liver              | biopsy         |
| 4      | PCMET2 | G-02-MJ | liver              | biopsy         |
| 5      | PCMET2 | G-03-NW | lung               | metastasectomy |
| 6      | PCMET2 | G-03-NW | lung               | metastasectomy |
| 7      | PCMET2 | G-04-PJ | distant lymph node | metastasectomy |
| 8      | PCMET2 | G-04-PJ | distant lymph node | metastasectomy |
| 9      | PCMET2 | G-05-PS | bone               | biopsy         |
| 10     | PCMET2 | G-05-PS | bone               | biopsy         |
| 11     | PCMET2 | G-06-RE | lung               | metastasectomy |
| 12     | PCMET2 | G-06-RE | lung               | metastasectomy |
| 13     | PCMET2 | G-07-SE | bone               | biopsy         |
| 14     | PCMET2 | G-07-SE | bone               | biopsy         |
| 15     | PCMET2 | G-08-WW | lung               | metastasectomy |
| 16     | PCMET2 | G-08-WW | lung               | metastasectomy |
| 17     | PCMET1 | G-10-BK | brain              | metastasectomy |
| 18     | PCMET1 | G-10-BK | brain              | metastasectomy |
| 19     | PCMET1 | G-11-JJ | lung               | biopsy         |
| 20     | PCMET1 | G-12-JM | distant lymph node | metastasectomy |
| 21     | PCMET1 | G-12-JM | distant lymph node | metastasectomy |
| 22     | PCMET1 | G-14-MJ | distant lymph node | biopsy         |
| 23     | PCMET1 | G-14-MJ | distant lymph node | biopsy         |
| 24     | PCMET1 | G-15-PZ | penis              | metastasectomy |
| 25     | PCMET1 | G-15-PZ | penis              | metastasectomy |
| 26     | PCMET1 | G-15-PZ | urethra            | metastasectomy |
| 27     | PCMET1 | G-16-SJ | lung               | metastasectomy |
| 28     | PCMET1 | G-16-SJ | lung               | metastasectomy |

**Supplementary Table 6** Emerin status in metastatic samples form PCa patients.

| Number | TMA    | Patient | Organ              | Emerin negative and low intensity (%) | Emerinrich MN/nucleus |
|--------|--------|---------|--------------------|---------------------------------------|-----------------------|
| 16     | PCMET2 | G-08-WW | lung               | 55.42635659                           | 0                     |
| 20     | PCMET1 | G-12-JM | distant lymph node | 0.086580087                           | 0                     |
| 21     | PCMET1 | G-12-JM | distant lymph node | 0.965250965                           | 0                     |
| 15     | PCMET2 | G-08-WW | lung               | 42.97800338                           | 0.012145749           |
| 24     | PCMET1 | G-15-PZ | penis              | 56.40394089                           | 0.032258065           |
| 5      | PCMET2 | G-03-NW | lung               | 17.82841823                           | 0.035897436           |
| 6      | PCMET2 | G-03-NW | lung               | 35.48387097                           | 0.045454545           |
| 13     | PCMET2 | G-07-SE | bone               | 2.127659574                           | 0.052631579           |
| 22     | PCMET1 | G-14-MJ | distant lymph node | 0                                     | 0.057777778           |
| 25     | PCMET1 | G-15-PZ | penis              | 33.61344538                           | 0.078740157           |
| 26     | PCMET1 | G-15-PZ | urethra            | 4.141208418                           | 0.114457831           |
| 4      | PCMET2 | G-02-MJ | liver              | 4.819277108                           | 0.115384615           |
| 23     | PCMET1 | G-14-MJ | distant lymph node | 0.354609929                           | 0.189102564           |
| 14     | PCMET2 | G-07-SE | bone               | 5.637982196                           | 0.19047619            |
| 3      | PCMET2 | G-02-MJ | liver              | 0.513478819                           | 0.191011236           |
| 8      | PCMET2 | G-04-PJ | distant lymph node | 71.48659626                           | 0.192857143           |
| 7      | PCMET2 | G-04-PJ | distant lymph node | 74.91448119                           | 0.194630872           |
| 12     | PCMET2 | G-06-RE | lung               | 18.9296333                            | 0.197802198           |
| 11     | PCMET2 | G-06-RE | lung               | 12.00564972                           | 0.311594203           |
| 27     | PCMET1 | G-16-SJ | lung               | 4.395604396                           | 0.381443299           |
| 1      | PCMET2 | G-01-JA | brain              | 90.25720966                           | negative              |
| 2      | PCMET2 | G-01-JA | brain              | 96.50655022                           | Emerin negative       |
| 9      | PCMET2 | G-05-PS | bone               | 85.57377049                           | Emerin negative       |
| 10     | PCMET2 | G-05-PS | bone               | 92.85714286                           | Emerin negative       |
| 17     | PCMET1 | G-10-BK | brain              | 100                                   | Emerin negative       |
| 18     | PCMET1 | G-10-BK | brain              | 100                                   | Emerin negative       |
| 19     | PCMET1 | G-11-JJ | lung               | 98.57142857                           | Emerin negative       |
| 28     | PCMET1 | G-16-SJ | lung               | 85.14285714                           | Emerin negative       |



**Supplementary Table 7** Antibody list used in the study.

| Target                                             | Clone/Cat.# | Company                  | Dilution                    |                  |
|----------------------------------------------------|-------------|--------------------------|-----------------------------|------------------|
|                                                    |             |                          | Immunofluorescence staining | Western blotting |
| <b>Emerin</b>                                      | 4G5         | Novocastra               | 1:500                       | 1:2000           |
| <b>Emerin</b>                                      | PA529731    | ThermoFisher Sci.        | 1:500                       | 1:2000           |
| <b>Sec61B</b>                                      | ab244487    | abcam                    | 1:100                       |                  |
| <b>LBR (Lamin B receptor)</b>                      | ab232731    | abcam                    | 1:200                       |                  |
| <b>cGAS</b>                                        | D1D3G       | Cell Signaling           | 1:200                       |                  |
| <b>SUN2</b>                                        | ab124916    | abcam                    | 1:100                       |                  |
| <b>LAP2alpha</b>                                   | 3A3         | Cell Signaling           | 1:100                       |                  |
| <b>BAF-1</b>                                       | A-11 X      | Santa Cruz Biotechnology | 1:100                       |                  |
| <b><math>\gamma</math>H2AX</b>                     | 20E3        | Cell Signaling           | 1:200                       |                  |
| <b>SUN1</b>                                        | ab124770    | abcam                    | 1:100                       |                  |
| <b>H3K27me3</b>                                    | C36B11      | Cell Signaling           | 1:100                       |                  |
| <b>Lamin B1</b>                                    | ab16048     | abcam                    | 1:200                       | 1:2000           |
| <b>p62</b>                                         | ab194721    | abcam                    | 1:200                       |                  |
| <b>Lamin A/C</b>                                   | ab215495    | abcam                    | 1:200                       |                  |
| <b>Lamin A/C</b>                                   | MA3-1000    | ThermoFisher Sci.        | 1:500                       | 1:2000           |
| <b>Nesprin 1</b>                                   | ab192234    | abcam                    | 1:100                       |                  |
| <b>SMC3</b>                                        | PA5-29131   | ThermoFisher Sci.        | 1:200                       | 1:1000           |
| <b>BRCA2</b>                                       | HPA026815   | Sigma-Aldrich            |                             | 1:1000           |
| <b>XRCC2</b>                                       | HPA065153   | Sigma-Aldrich            |                             | 1:1000           |
| <b>Pericentrin</b>                                 | ab28144     | abcam                    | 1:200                       |                  |
| <b>Pericentrin</b>                                 | ab270119    | abcam                    | 1:200                       |                  |
| <b>Paxilin</b>                                     | ab28144     | abcam                    | 1:200                       |                  |
| <b><math>\alpha</math>-Tubulin</b>                 | T5168       | Sigma-Aldrich            |                             | 1:5000           |
| <b><math>\beta</math>-actin</b>                    | AC-74       | Sigma-Aldrich            |                             | 1:10000          |
| <b>Secondary antibodies</b>                        |             |                          |                             |                  |
| <b>Goat anti-Rabbit IgG (H+L) Alexa Fluor™ 488</b> | A11008      | ThermoFisher Sci.        | 1:500                       |                  |
| <b>Goat anti-Rabbit IgG (H+L) Alexa Fluor™ 546</b> | A11010      | ThermoFisher Sci.        | 1:500                       |                  |
| <b>Goat anti-Rabbit IgG (H+L) Alexa Fluor™ 647</b> | A21244      | ThermoFisher Sci.        | 1:500                       |                  |
| <b>Goat anti-Mouse IgG (H+L) Alexa Fluor™ 488</b>  | A11001      | ThermoFisher Sci.        | 1:500                       |                  |
| <b>Goat anti-Mouse IgG (H+L) Alexa Fluor™ 546</b>  | A11003      | ThermoFisher Sci.        | 1:500                       |                  |

|                                                                    |                 |                           |       |         |
|--------------------------------------------------------------------|-----------------|---------------------------|-------|---------|
| <b>Goat anti-Mouse IgG (H+L)<br/>Alexa Fluor™ 647</b>              | A21235          | ThermoFisher Sci.         | 1:500 |         |
| <b>AlexaFluor® 680-conjugated<br/>AffiniPure Goat Anti-Rabbit</b>  | 111-625-<br>144 | Jackson<br>ImmunoResearch | -     | 1:12500 |
| <b>AlexaFluor® 790-conjugated<br/>AffiniPure Donkey Anti-Mouse</b> | 715-655-<br>150 | Jackson<br>ImmunoResearch | -     | 1:12500 |

**Supplementary Table 8** RNAi sequences used in the study

| <b>Target Gene Symbol</b> | <b>siRNA ID</b> | <b>Sense</b>              | <b>Antisense</b>          |
|---------------------------|-----------------|---------------------------|---------------------------|
| <b>SMC3</b>               | s17427          | GCCUAAGCAACGUAGCUUAt<br>t | UAAGCUACGUUGCUUAGCat      |
| <b>LMNA</b>               | 144426          | GGAGCUGAAAGCGCGCAAUt<br>t | AUUGCGCGCUUUCAGCUCct      |
| <b>LMNB1</b>              | 144054          | GCUCUUGCUACUGCACUUGt<br>t | CAAGUGCAGUAGCAAGAGCt<br>g |
| <b>BRCA2</b>              | s2085           | GGAUUAUACAUAUUUCGCA<br>tt | UGCGAAUAUGUAUAAUCCa<br>g  |
| <b>XRCC2</b>              | s14945          | GGCUAGUUACAAUUCUUGA<br>tt | uCAAGAAUUGUAACUAGCCg<br>g |

**a**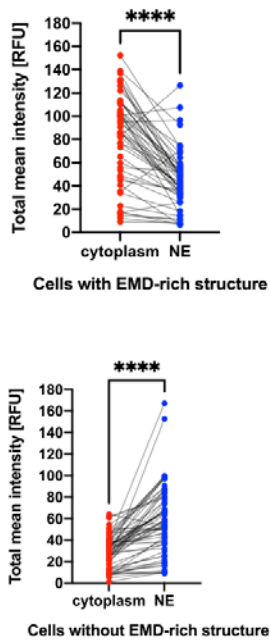**b**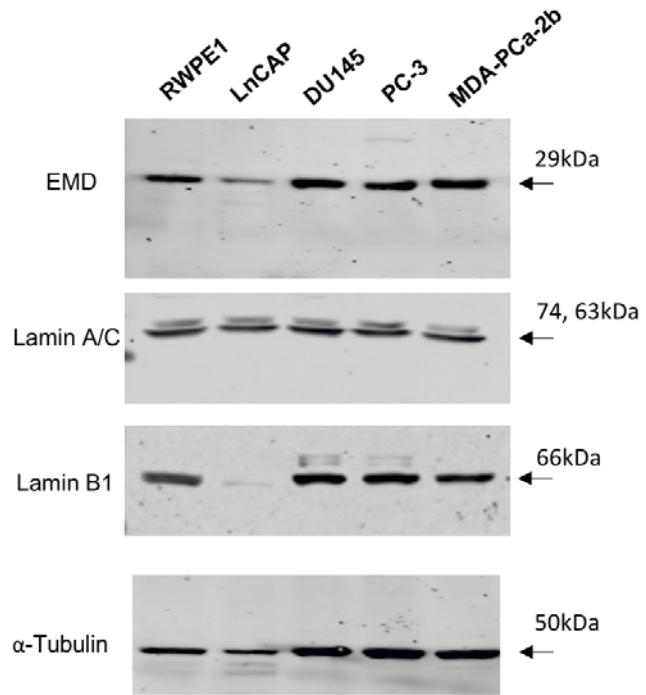**c**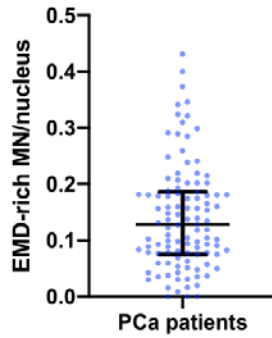**d**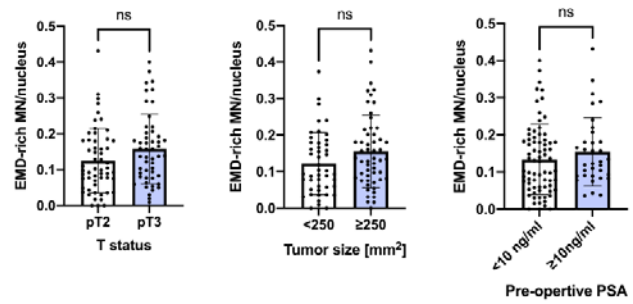**e**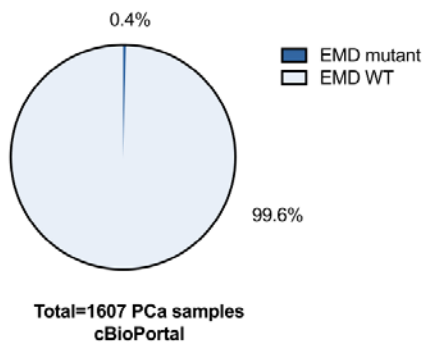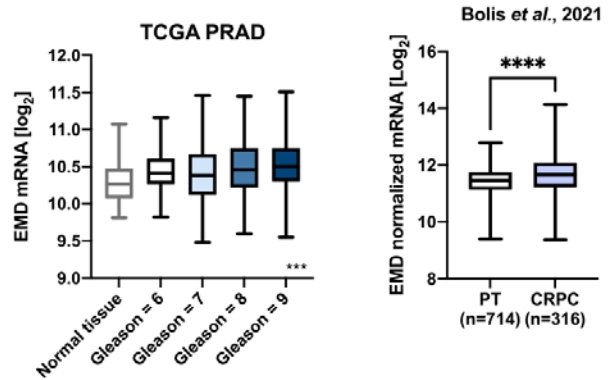

## Supplementary Figure 1

**a** Total mean Emerin intensity paired measurement in NE comparing to cytoplasm cells with Emerin-rich MN (EMD-rich MN, n=51 cells), and cells without Emerin-rich MN (n=63 cells).

**b** Western blot performed in various prostate cell lines for Emerin (EMD), Lamin A/C and Lamin B1.

**c** Emerin-rich structures distribution among PCa patients (n=107).

**d** Clinical associations between Emerin-rich MN and T status (n=107 patients) tumor size (n=100 patients), and pre-operative PSA levels (n=119 patients).

**e** Prevalence of EMD mutations in prostate adenocarcinoma according to cBioPortal for Cancer Genomics; association of EMD mRNA expression to Gleason score according to The Cancer Genome Atlas; comparison between EMD mRNA expression in primary prostate cancer tumors (PT) and castration-resistant prostate cancer (CRPC) according to Bolis *et al.*, 2021.

Paired plot: Wilcoxon matched-pair signed rank test; Box-plot; Whiskers indicate min to max values, within the box the first quartile, median, third quartile are represented. For multiple comparison Kruskal-Wallis test was used. Scatter-plot with bar (mean with SD) and bar-plots Mann-Whitney U test. Error bars indicate SD. \*P < 0.05; \*\*P < 0.01; \*\*\*P < 0.001; \*\*\*\*P < 0.0001; ns, not significant.

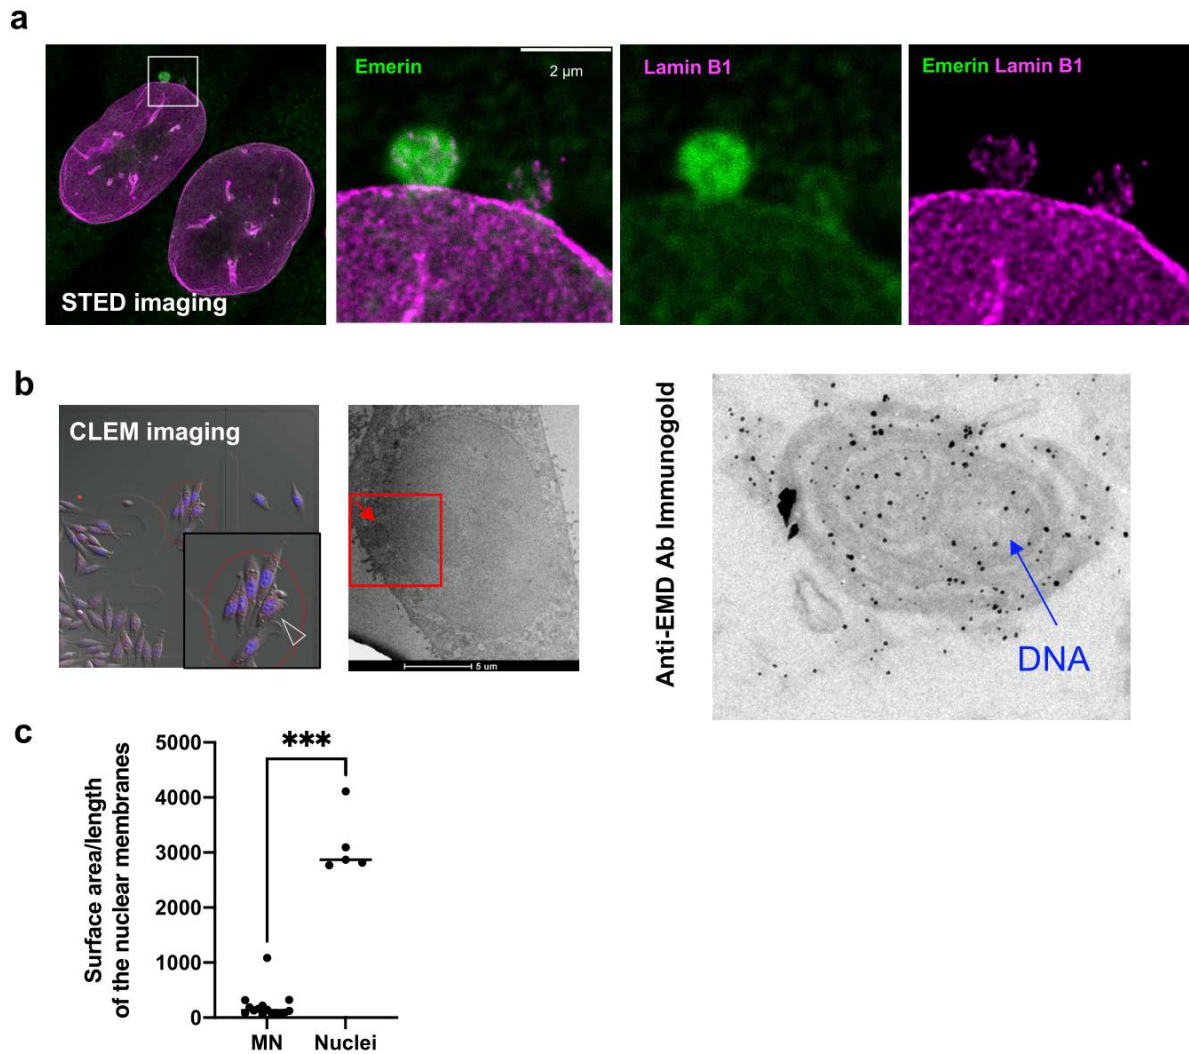

## Supplementary Figure 2

**a** Super Resolution Stimulated Emission Depletion (STED) microscopy of Emerin-rich MN stained for Emerin and Lamin B1, EMD is shown in green, Lamin B1 in magenta.

**b** Brightfield image and electron microscopy image of a cell in Correlative light electron microscopy (CLEM) experiment of Emerin-rich MN. Left panel, immunogold labeling of Emerin-rich MN.

**c** The average ratio of surface area to nuclear membranes in micronuclei comparing to the nuclei of neighboring cells that did not have micronuclei.

Scatter-plot with bar (mean with SD) and bar-plots Mann-Whitney U test. Error bars indicate SD. \* $P < 0.05$ ; \*\* $P < 0.01$ ; \*\*\* $P < 0.001$ ; \*\*\*\* $P < 0.0001$ ; ns, not significant.

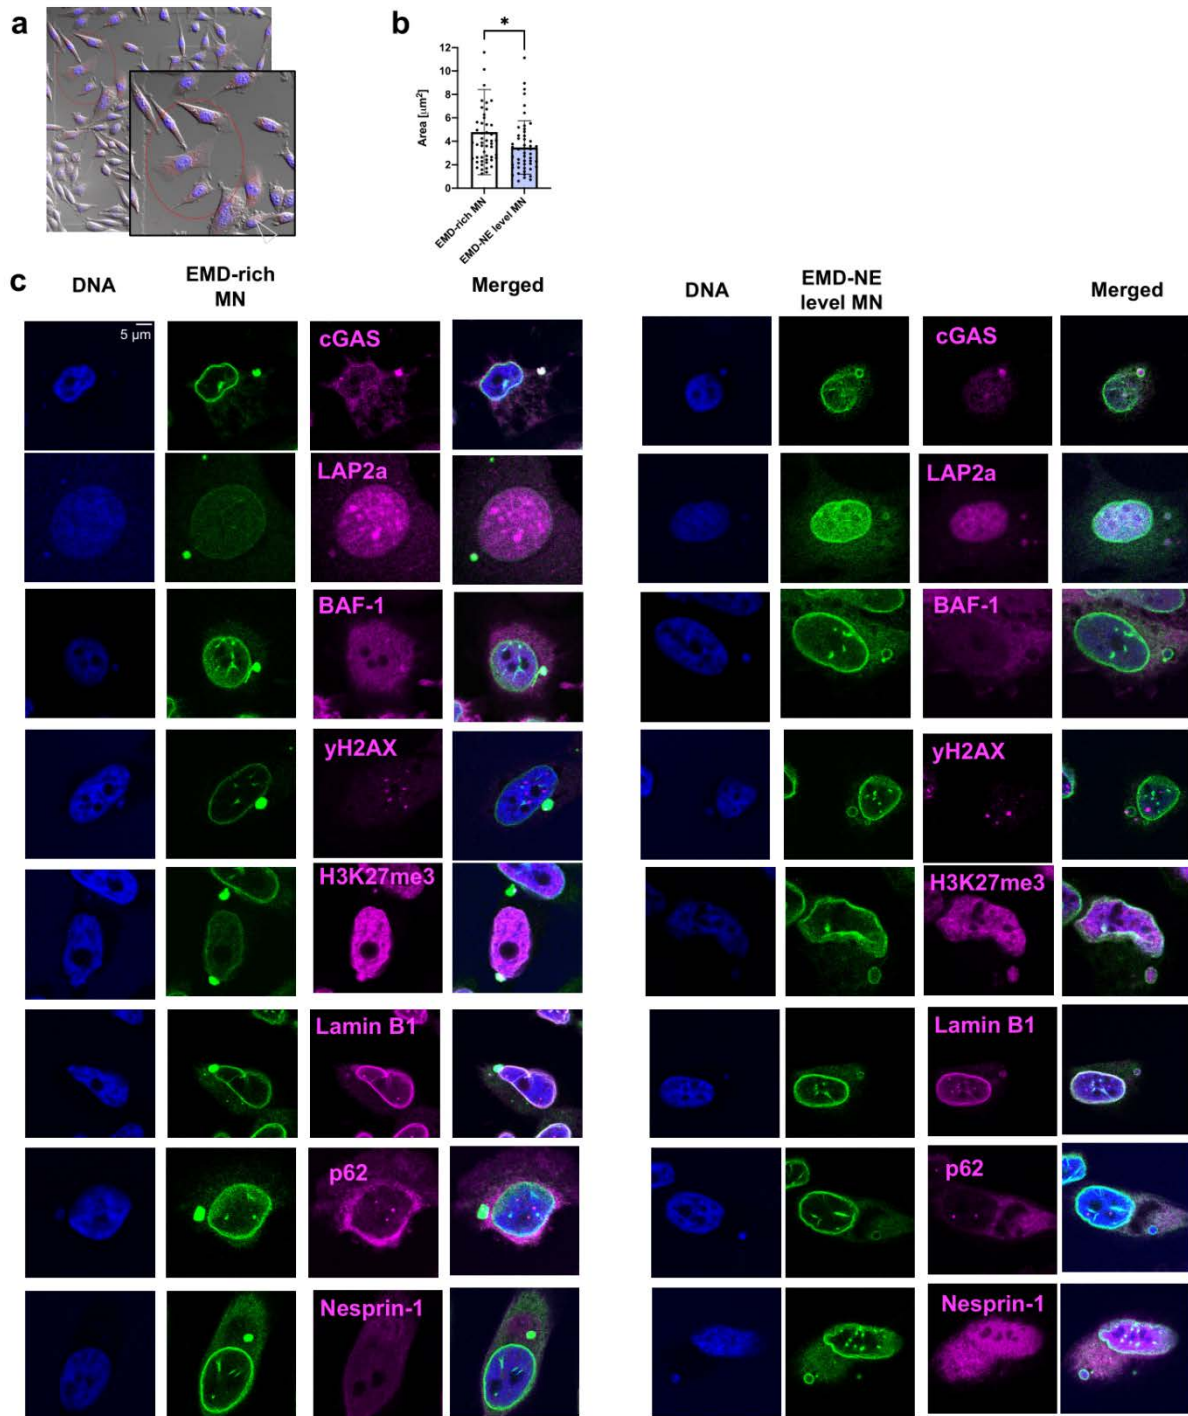

### Supplementary Figure 3

**a** Brightfield image of a cell with Emerin-rich (EMD-rich) MN and Emerin-NE-level MN (EMD-NE-level) that was further used in correlative light electron microscopy (CLEM).

**b** Area quantification of Emerin-rich MN (n=51 cells) and EMD-NE-level MN (n=50 cells).

**c** Representative micrographs of staining for cGAS, LAP2a, BAF-1, yX2AX, H3K27me2, Lamin B1, p62, and Nesprin-1 in Emerin-rich MN and Emerin-NE-level MN, EMD is presented in green, other proteins in magenta.

Scatter-plot with bar (mean with SD) and bar-plots Mann-Whitney U test. Error bars indicate SD.\*P < 0.05; \*\*P < 0.01; \*\*\*P < 0.001; \*\*\*\*P < 0.0001; ns, not significant.



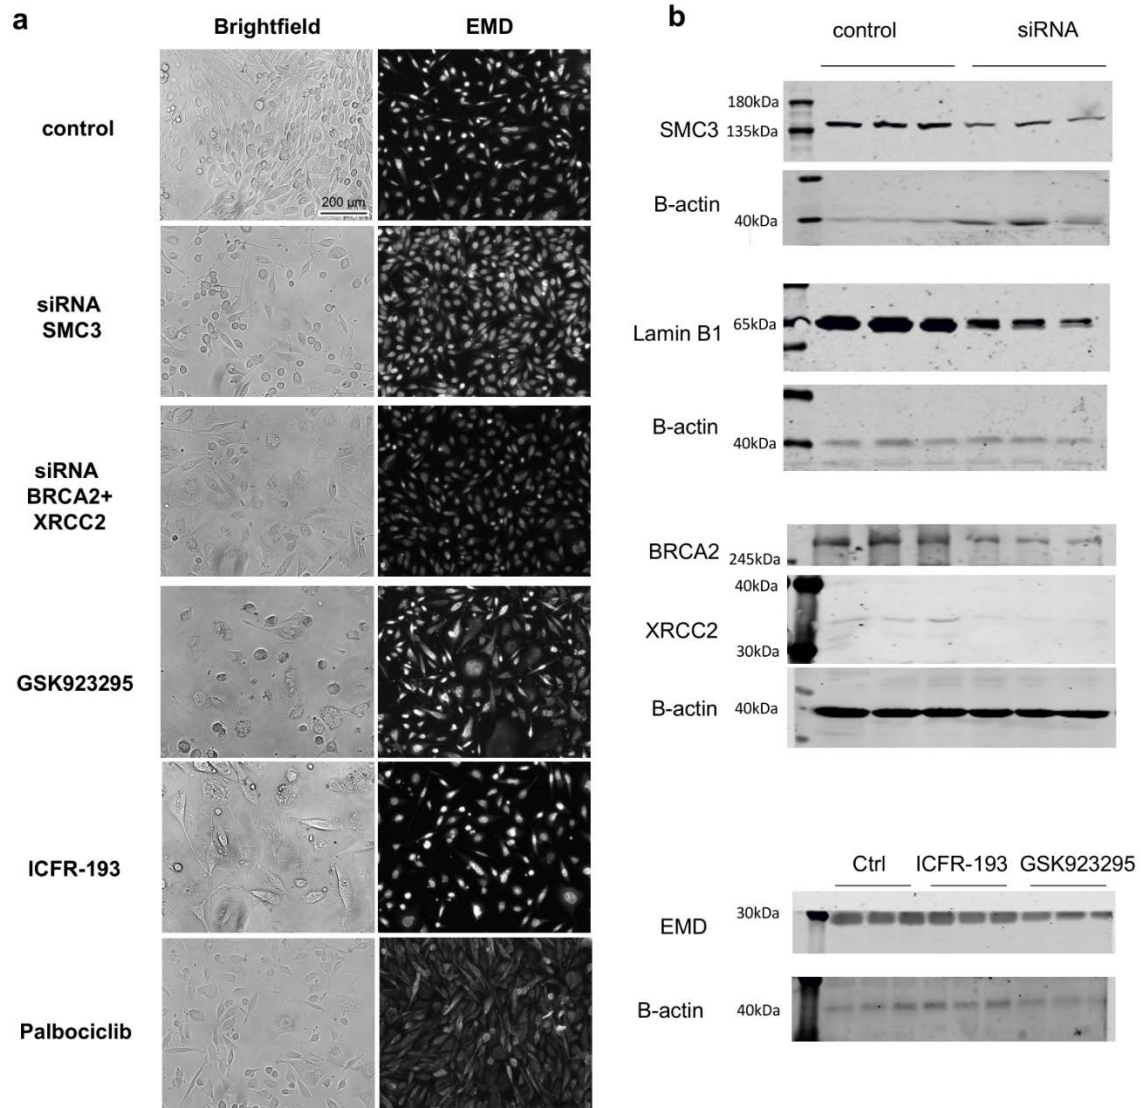

**Supplementary Figure 4**

**a** Representative images of brightfield and Emerin in control PC-3 cells and the treated ones.

**b** Western blot analysis of Emerin in PC-3 cells under various knock-down conditions.

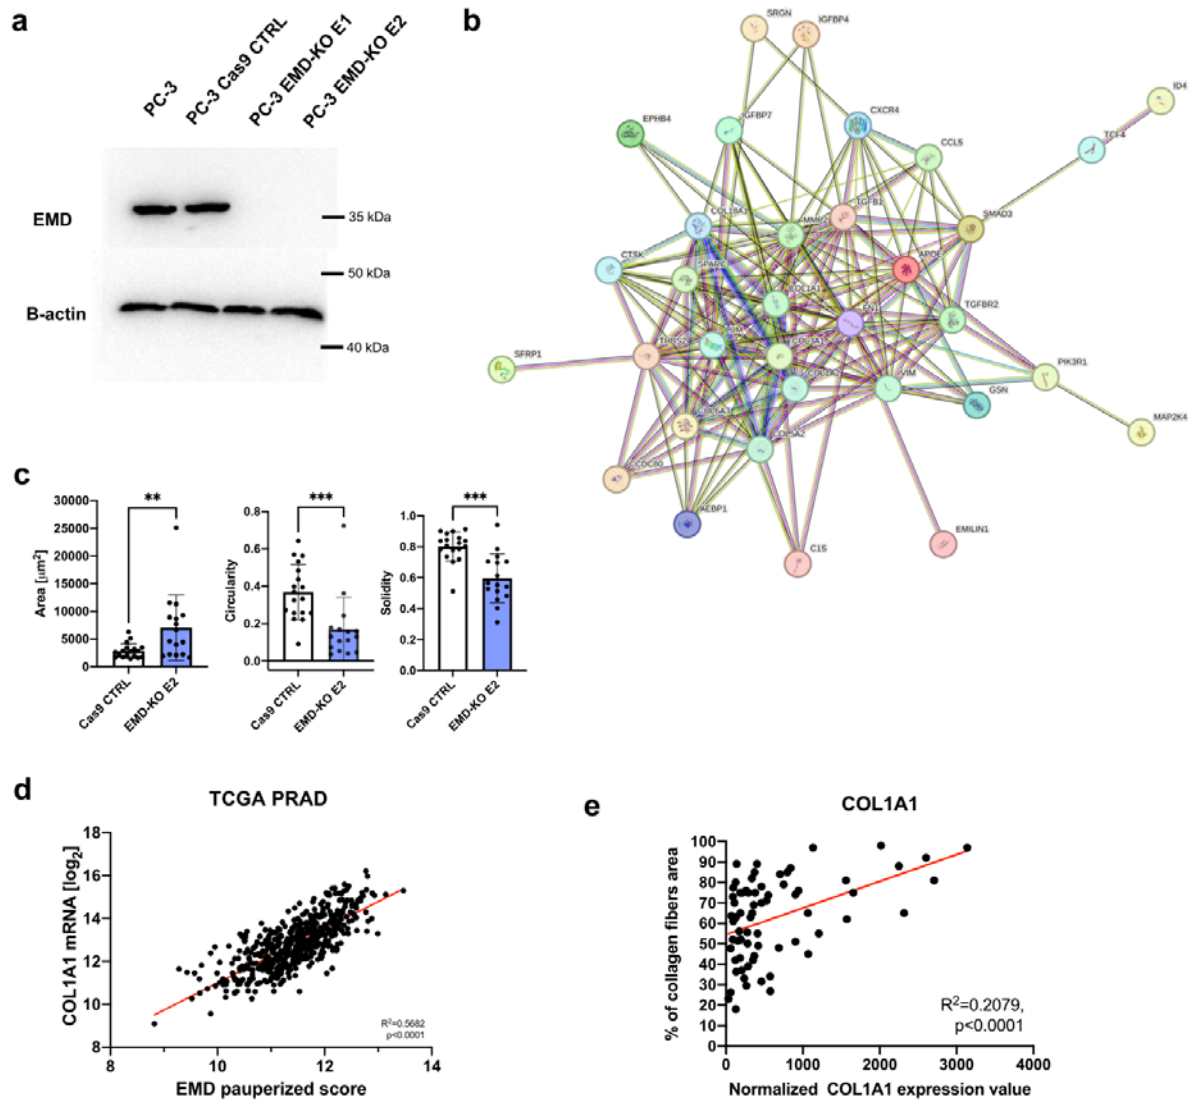

### Supplementary Figure 5

**a** The interaction network of protein products of differentially expressed genes in PCa tumors with Emerin pauperized phenotype visualized using STRING v11.

**b** Western blot analysis of Emerin in PC-3 control and EMD-KO cells.

**c** Comparison of properties including area, circularity, solidity of PC-3 control (n=18) and EMD-KO (n=16) spheroids.

**d** Correlation between COL1A1 mRNA and Emerin pauperized score in TCGA PRAD dataset.

**e** Correlation between % of collagen fiber area assessed with Picro Sirius stain and normalized COL1A1 expression value.

Scatter-plot with bar (mean with SD), bar-plots Mann-Whitney U test, correlation simple linear regression with 95% confidence intervals. Error bars indicate SD. \*P < 0.05; \*\*P < 0.01; \*\*\*P < 0.001; \*\*\*\*P < 0.0001; ns, not significant.

### **Supplementary Movie 1**

Live cell imaging of mitosis of PC-3 cells stably expressing EMD-EGFP construct, treated with IRCF-193 inhibitor. The cell division is associated with chromatin bridge formation and EMD-rich MN formation after its resolution. Scale bar 10  $\mu\text{m}$ , time in minutes. EMD-GFP is color coded.

### **Supplementary Movie 2**

Live cell imaging of mitosis of PC-3 cells stably expressing EMD-EGFP construct, treated with IRCF-193 inhibitor. The cell division is associated with chromatin bridge formation and EMD-rich MN formation during its resolution. Scale bar 10  $\mu\text{m}$ , time in minutes. EMD-GFP is color coded.

### **Supplementary Movie 3**

Live cell imaging of PC-3 cells stably expressing EMD-EGFP construct, treated with IRCF-193 inhibitor. The cell division ends up in bi-nucleated cell formation. Scale bar 10  $\mu\text{m}$ , time in minutes. EMD-GFP is color coded.

### **Supplementary Movie 4**

iFRAP (inverse fluorescence recovery after photobleaching) of nuclear envelope in of PC-3 cells stably expressing EMD-EGFP construct. Scale bar 10  $\mu\text{m}$ , time in seconds.

### **Supplementary Movie 5**

iFRAP (inverse fluorescence recovery after photobleaching) of EMD-rich MN in of PC-3 cells stably expressing EMD-EGFP construct. Scale bar 10  $\mu\text{m}$ , time in seconds.

### **Supplementary Movie 6**

Comparison of 2D migration properties of PC-3 cells stably expressing EMD-EGFP construct in cell with nuclear envelope localization of EMD and a cell with EMD-rich MN. Scale bar 10  $\mu\text{m}$ , time in minutes.
